# Supplementary material for: Mechanical Control of Cell Migration by the Metastasis Suppressor Tetraspanin CD82/KAI1
Source: MDPI journal article supplement (doi:10.3390/cells10061545), 2021-06-18
Supplement: s1 [file s1]

## Supplementary information

10 movies:

**Supplementary Movie S1:** HB2 single cell migration. Persistent cell migration can be observed (Figure S1).

**Supplementary Movie S2:** HB2-CD82 single cell migration. Cell migration is impaired, cells turn round (Figure S1).

**Supplementary Movie S3:** MCF10a cells transfected with Si Ctl single cell migration: they express CD82 and turn in round. (Figure S2).

**Supplementary Movie S4:** MCF10a cells transfected with siCD82 single cell migration: persistent cell migration can be observed. (Figure S2)

**Supplementary Movie S5:** Talin-GFP dynamics in 1 (out of 10) HB2 migrating cell. Notice the sliding of talin-GFP spots, retrograde from the migration front (Figure S1).

**Supplementary Movie S6:** Talin-GFP dynamics in 1 (out of 10) HB2-CD82 migrating cell where talin-GFP clusters are mostly immobile (Figure S1).

**Supplementary Movie S7:** Talin-GFP dynamics in 1 (out of 5) MCF10 si Ctl. The cell shows large peripheral adhesion sites and are slowly moving (Figure S3).

**Supplementary Movie S8:** Talin-GFP dynamics in 2 (out of 5) MCF10a siCD82. Cells show small and dynamic adhesion sites and are moving faster than controls (Figure S3).

**Supplementary Movie S9:** Caveolin-GFP dynamics in 1 (out of 10) HB2 cells in iso (left) and after 5 min hypoosmotic (right) condition observed by TIRF microscopy.

**Supplementary Movie S10:** Caveolin-GFP dynamics in 1 (out of 10) HB2-CD82 cell in iso (left) and after 5 min hypoosmotic (right) condition observed by TIRF microscopy.

Figures:

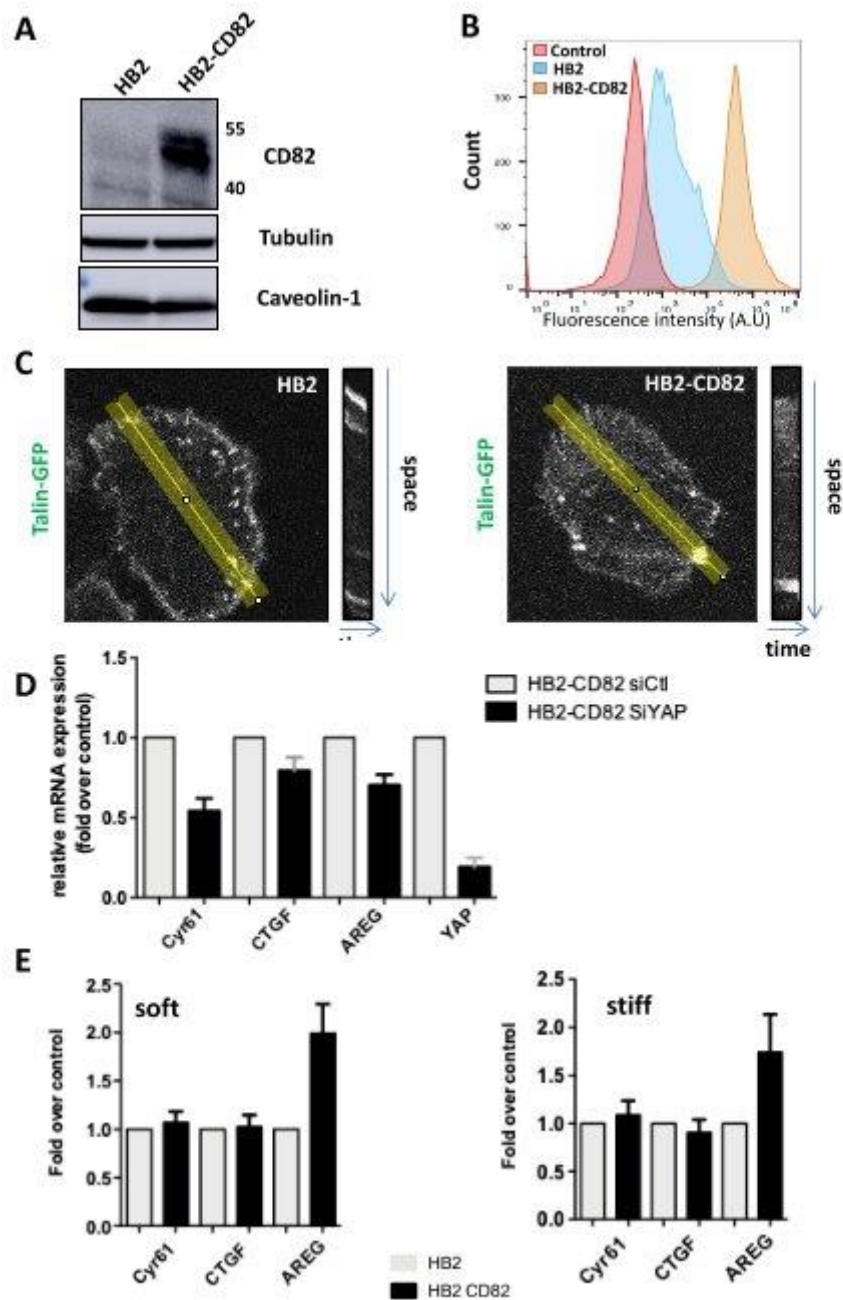

Figure S1: CD82 expression and its effect on talin-GFP, actin and YAP transcriptional targets in HB2 cells.

**Figure S1. CD82 expression and its effect on Talin-GFP, actin and YAP transcriptional targets in HB2 cells.** **A)** CD82 and caveolin-1 expression in HB2 and HB2-CD82 cells by Western blot; tubulin is shown as a loading control. **B)** Cytometry analyses of CD82 expression in HB2 and HB2-CD82 cells, a control with only the secondary antibody is also shown. **C)** kymographs extracted from the supplementary Movies 3&4 for HB2 (left) and HB2-CD82 (right) cells; notice the cycling bands in HB2 cells (left) indicating Talin-GFP movements. **D)** RT-QPCR analysis of YAP targets genes in HB2-CD82 cells. Cells grown on stiff and transfected with Si ctl or siYAP showing YAP targets (mostly Cyr 61 and AREG) in HB2-CD82 cells **E)** HB2 cells grown on soft and stiff substrates (one representative experiment carried out in triplicate over 3 independent experiments) showing AREG mRNA overexpression in CD82 overexpressing cells.

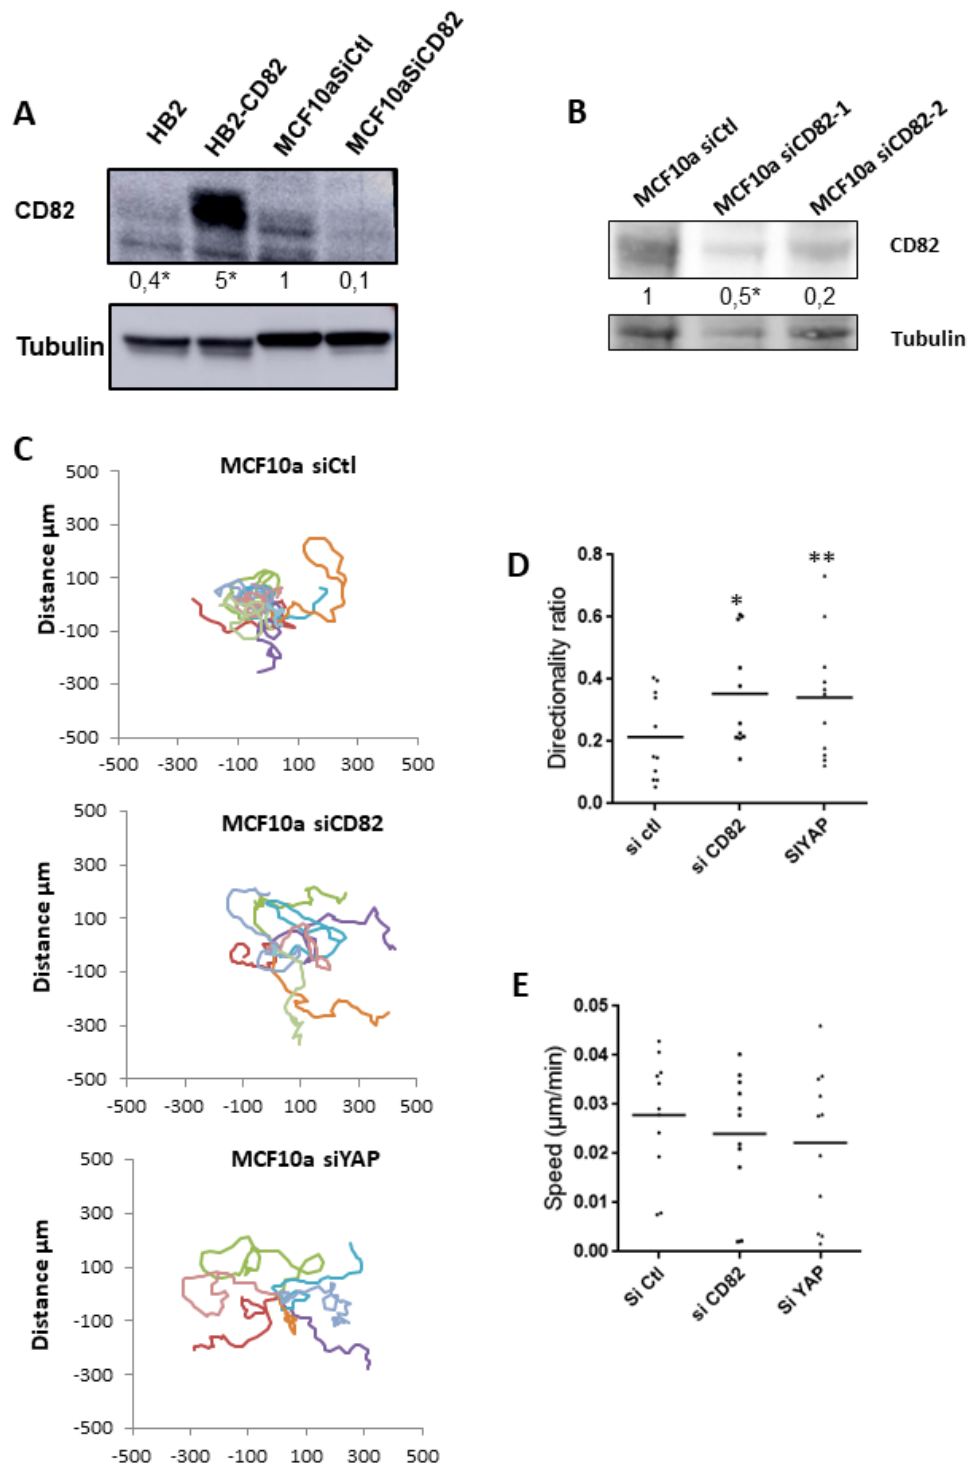

**Figure S2: CD82 expression and its effect on EGF-induced cell migration in MCF10a**

**Figure S2. CD82 expression and its effect on EGF-induced cell migration in MCF10a.** **A)** CD82 and caveolin-1 expression in MCF10a cells and HB2 cells by Western blot; tubulin was used as a loading control and the numbers are from gel quantification performed with Image J software. \* indicates that values have been corrected for the amount of tubulin; **B)** CD82 expression following downregulation by SiRNA from Santa Cruz (siCD82-1) and Eurogentec (SiCD82-2). Tubulin was used as a loading control. The numbers are from gel quantification performed with image J software, \*\*indicates that values were corrected for the amount of tubulin; **C)** Trajectories of EGF-stimulated MCF10a cells transfected with siCtl, SiCD82 or siYAP (for clarity only 10 trajectories are shown per condition); **D)** Directionality ratio of the cells determined as the shortest distance between the starting and arrival points divided by the real distance traveled by the cells; **E)** Average speed of the cells,  $n = 11$ , respectively; \* $p < 0.05$

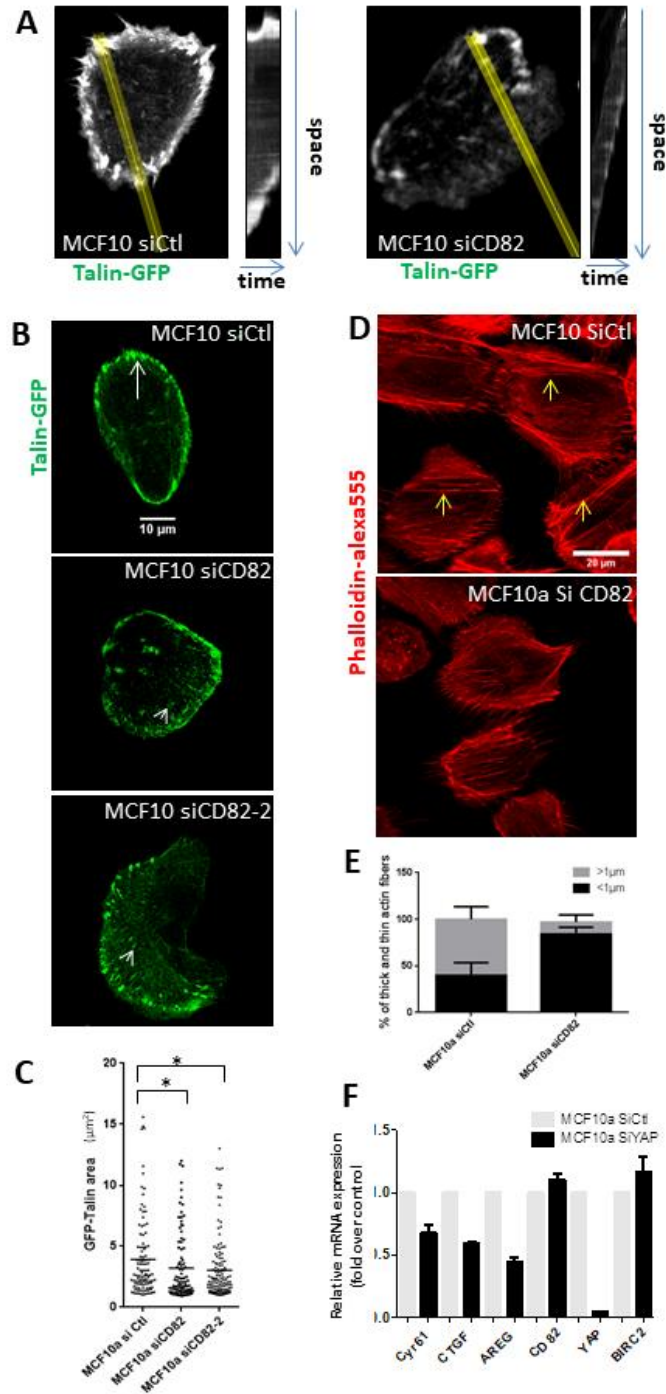

Figure S3: CD82 expression and its effect on talin-GFP , actin and YAP transcriptional targets in MCF10a

**Figure S3. CD82 expression and its effect on talin-GFP, actin and YAP transcriptional targets in MCF10a.** **A)** kymographs extracted from supplementary Movies 5&6 for MCF10a cells transfected with SiRNA control or SiRNA targeting CD82. Notice the cycling bands indicating Talin-GFP movements in MCF10 Si CD82. **B)** Talin-GFP labelling in MCF10a siCtrl (left panel) and MCF10a siCD82-1 and siCD82-2 (SiRNA validation shown in Figure S2B). **C)** Quantification of the size of the peripheral adhesions on 11 cells from 3 independent experiments \*p<0.05. **D)** Phalloidin-Alexa-555 labelling of actin in MCF10a siCtrl and Si CD82cells (right panel). Arrows point out thick fibers in MCF10a siCtrl; **E)** Quantification of the fibers thickness shown in D using Fiji line plot plugin (measurement of the width of the peaks), shown as the percentage of the total number of fibers on 20 cells from 4 independent experiments. **F)** RT-QPCR analysis of YAP target genes in MCF10a SiCtrl or SiYAP (one representative experiment in triplicate over 3 independent experiments). Notice the strong downregulation of YAP and the downregulation of the YAP targets Cyr61, CTGF and AREG.

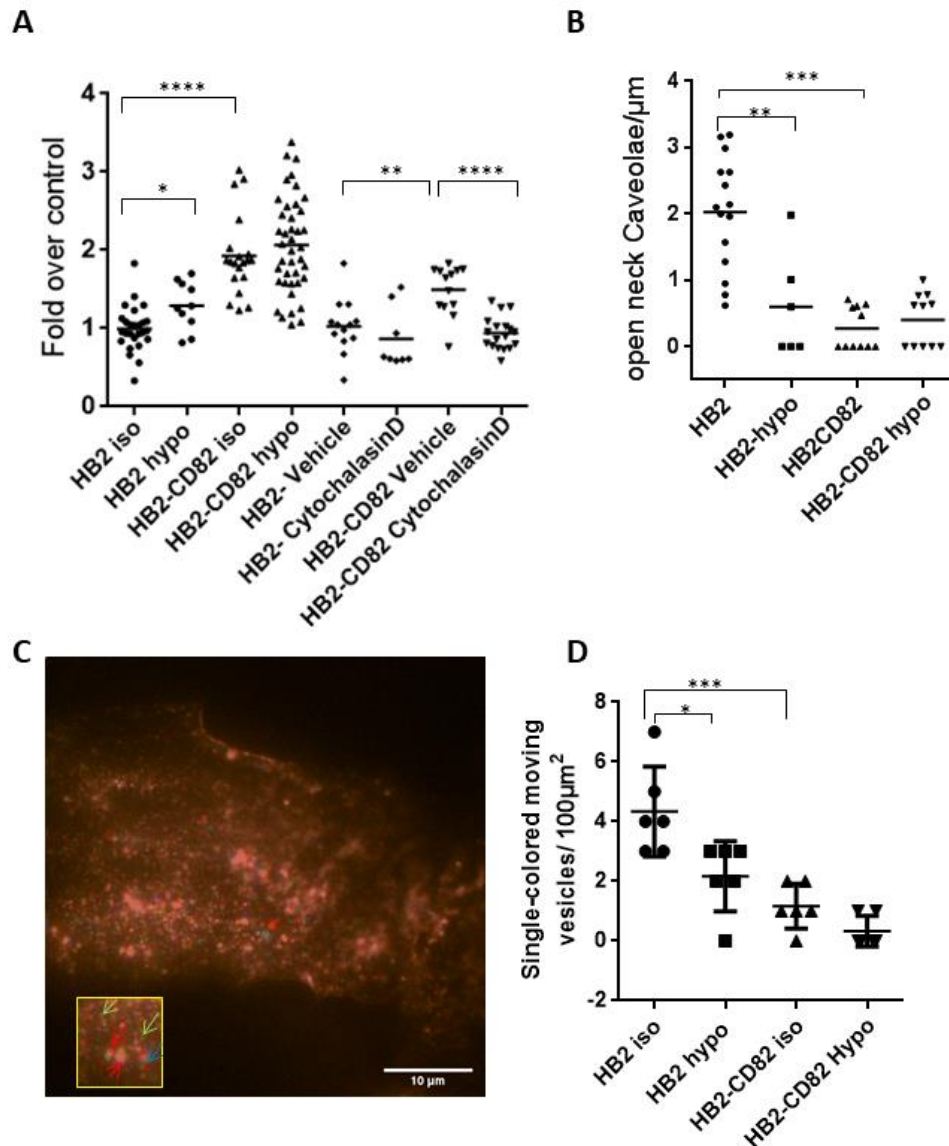

**Figure S4: Regulation of membrane tension and cell surface caveolae density in HB2 cells**

**Figure S4. Regulation of membrane tension and cell surface caveolae density in HB2 cells** **A)** membrane tension regulation by a mild hypoosmotic shock and upon cytoskeleton disruption. 3 cells were first analyzed then water (hypoosmotic shock) or 200μg/ml cytochalasin D or vehicle (DMSO) was added to the plate, incubated for 5 min and 3 additional cells were analyzed. \*  $p < 0.05$ , \*\*\*\* $p < 0.0001$ , ns non-significant. **B)** Quantification of the number of caveolae per μm of plasma membrane in HB2 and HB2-CD82 cells under iso or mild hypotonic conditions. \*\* $P < 0.01$ , ns: non-significant. **C)** Example of image quantification: 3 successive images were extracted from Movie 9 (TIRF imaging of caveolin 1-GFP in HB2 cells under isotonic conditions). They were taken 1 sec apart and colored blue, green and red, respectively and then merged (image shown). Vesicles moving in the 1 sec time frame appeared monochromatic while vesicles not moving have merged colors (yellow, violet, white). The insert highlights monochromatic moving vesicles. **D)** Quantification of moving vesicles in 3 different areas of 100μm<sup>2</sup> from 2 movies of HB2 and HB2-CD82 cells under iso or hypotonic conditions. \* $p < 0.05$ , \*\*\* $p < 0.001$ .

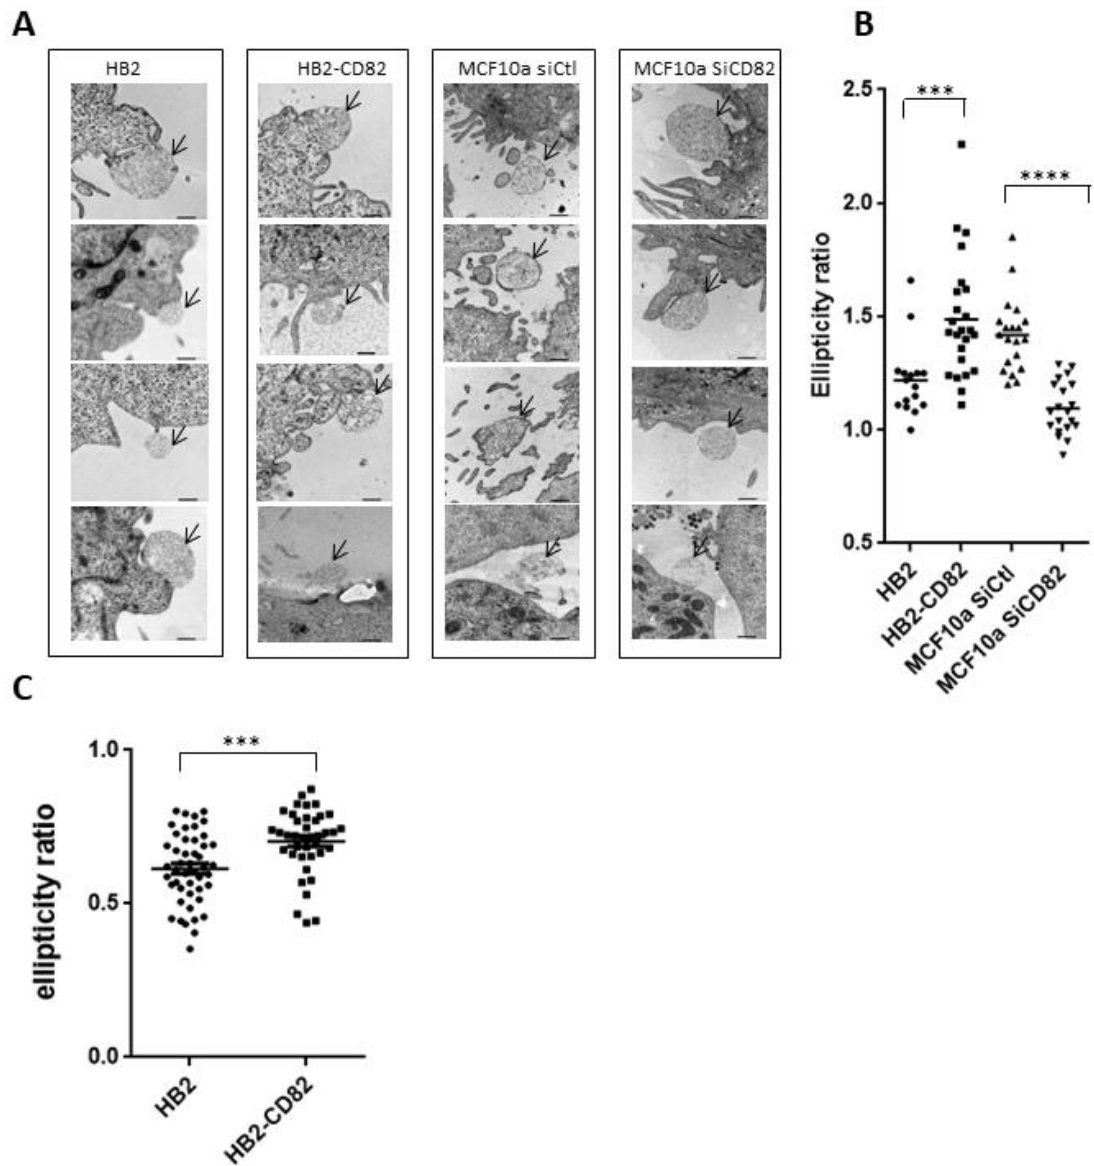

Figure S5: Migrasomes (A&B) and nuclei (C) deformation induced by CD82

**Figure S5.** Migrasomes and nuclei deformation induced by CD82. A) Panel of micrographs showing migrasomes (black arrows) in HB2, HB2-CD82, MCF10a cells silenced or not for CD82. B) Quantification CD82-induced deformation of migrasomes. The ellipcity ratio was determined by dividing the long axis by the short axis of intact migrasomes in HB2, HB2-CD82, MCF10a siCtl and MCF10a SiCD82 from 16, 24, 20 and 20 cells, respectively. \*\*\* $p < 0.001$ , \*\*\*\* $p < 0.0001$ . A ratio of 1 indicates round migrasomes. C) The ellipcity ratio of nucleus was determined by dividing random measured axes in HB2 vs HB-CD82 cells plated on glass-coverslips (47 and 39 cells,  $n=3$ , respectively). A ratio of 1 indicates round nuclei (\*\* $p < 0.01$ ).
